# Supplementary material for: Tailoring the structural and morphological properties of hydroxyapatite materials to enhance the capture efficiency towards copper(ii) and lead(ii) ions
Source: Royal Society of Chemistry journal article supplement (doi:10.1039/c8nj00468d), 2018-01-01
Supplement: c8nj00468d1.pdf [file c8nj00468d1.pdf]

# **Tailoring structural and morphological properties of hydroxyapatite materials to enhance the capture efficiency towards copper(II) and lead(II) ions**

**Sebastiano Campisi, Carlo Castellano and Antonella Gervasini**

Dipartimento di Chimica, Università degli Studi di Milano, via Camillo  
Golgi 19, 20133 Milano, Italy.

**Electronic Supplementary Information**

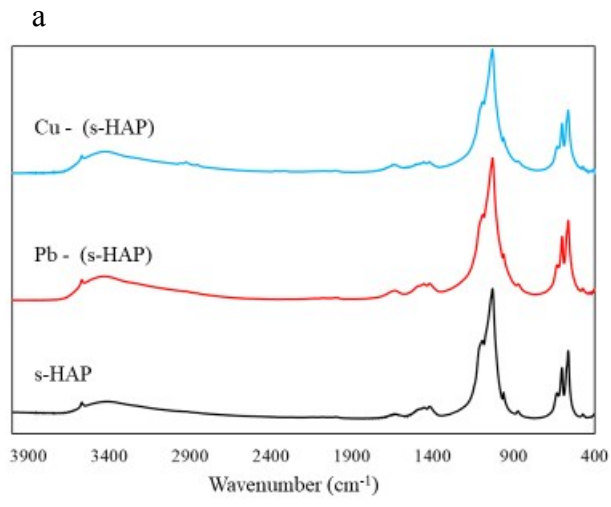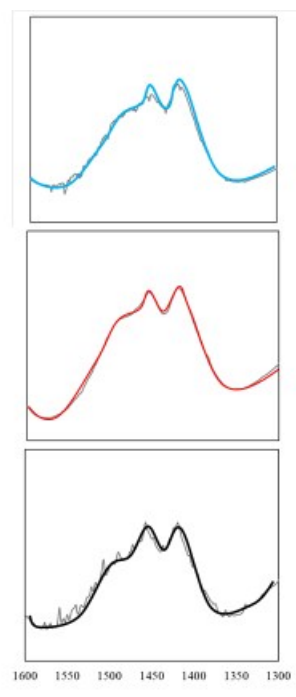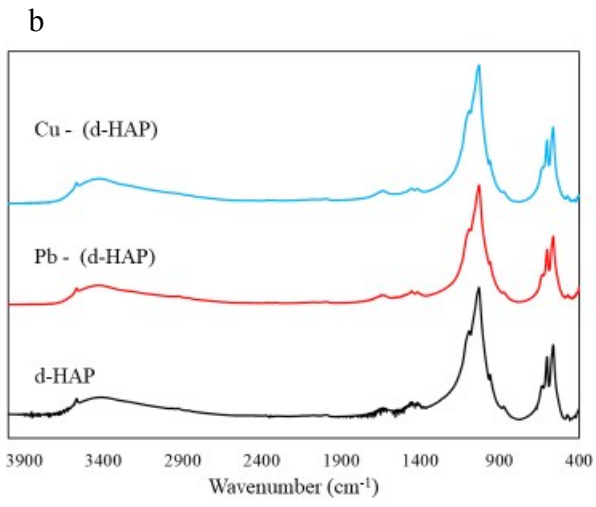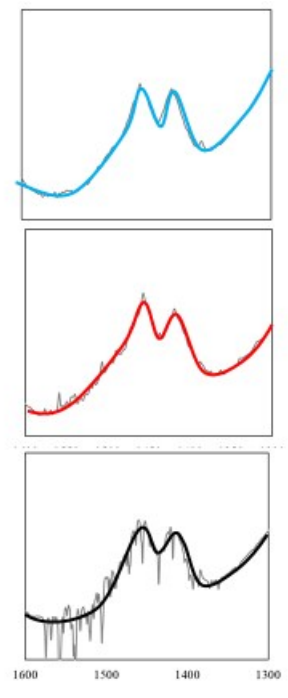

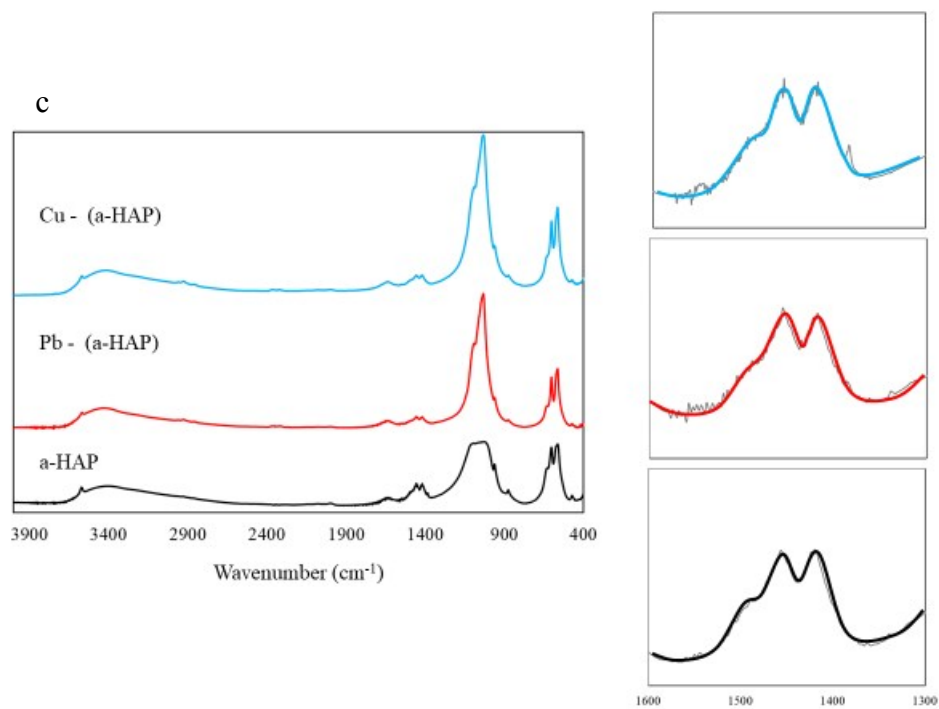

**Figure ES1** FT-IR spectra in the 400-4000  $\text{cm}^{-1}$  region (left) and magnification of 1300-1600  $\text{cm}^{-1}$  region (right) of metal (Cu or Pb) loaded HAP: (a) s-HAP, (b) d-HAP and (c) a-HAP samples.
